# Supplementary material for: What type of nanoscopic environment does a cationic fluorophore experience in room temperature ionic liquids?
Source: Royal Society of Chemistry journal article supplement (doi:10.1039/c5cp02036k), 2015-01-01

## **What Kind of Nanoscopic Environment a Cationic Fluorophore Experiences in Room Temperature Ionic Liquids?**

Anup Ghosh, Chayan K. De, Tanmay Chatterjee, and Prasun K. Mandal\*

Department of Chemical Sciences, Indian Institute of Science Education and Research (IISER) - Kolkata,  
Mohanpur, West-Bengal, 741246, India. e-mail: prasunchem@iiserkol.ac.in

| <b>Contents:</b>                                                                                                                | <b>Page #</b> |
|---------------------------------------------------------------------------------------------------------------------------------|---------------|
| <b>S1:</b> Absorption and emission spectra of Rhodamine 6G in different RTILs                                                   | <b>3</b>      |
| <b>S2:</b> Fluorescence quenching related plots of Rhodamine 6G in emim[FAP]<br>(Spectral)                                      | <b>4</b>      |
| <b>S3:</b> Fluorescence quenching related plots of Rhodamine 6G in emim[FAP]<br>(Temporal)                                      | <b>5</b>      |
| <b>S4:</b> Table depicting time constants related to fluorescence decay of emim[FAP]<br>And Rhodamine 6G                        | <b>6</b>      |
| <b>S5:</b> Fluorescence quenching related plots of Rhodamine 6G in bmim[FAP]<br>(Spectral)                                      | <b>7</b>      |
| <b>S6:</b> Fluorescence quenching related plots of Rhodamine 6G in bmim[FAP]<br>(Temporal)                                      | <b>8</b>      |
| <b>S7:</b> Table depicting time constants related to fluorescence decay of bmim[FAP]<br>and Rhodamine 6G                        | <b>9</b>      |
| <b>S8:</b> Fluorescence quenching related plots of Rhodamine 6G in hmim[FAP]<br>(Spectral)                                      | <b>10</b>     |
| <b>S9:</b> Fluorescence quenching related plots of Rhodamine 6G in hmim[FAP]<br>(Temporal)                                      | <b>11</b>     |
| <b>S10:</b> Table depicting time constants related to fluorescence decay of hmim[FAP]<br>and Rhodamine 6G                       | <b>12</b>     |
| <b>S11:</b> Fluorescence quenching related plots of Rhodamine 6G in hmim[PF <sub>6</sub> ]<br>(Spectral)                        | <b>13</b>     |
| <b>S12:</b> Fluorescence quenching related plots of Rhodamine 6G in hmim[PF <sub>6</sub> ]<br>(Temporal)                        | <b>14</b>     |
| <b>S13:</b> Table depicting temporal time constants related to fluorescence<br>decay of hmim[PF <sub>6</sub> ] and Rhodamine 6G | <b>15</b>     |
| <b>S14:</b> Fluorescence quenching related plots of Rhodamine 6G in hmim[BF <sub>4</sub> ]<br>(Spectral & temporal)             | <b>16</b>     |

## S1:

(a) Absorption spectrum of Rhodamine 6G (blue) and emission spectra of emim[FAP] [ $\lambda_{\text{ex}}=377\text{nm}$  (black),  $\lambda_{\text{ex}}=402\text{nm}$  (red)]

(b) Absorption spectrum of Rhodamine 6G (red) and emission spectra of bmim[FAP] [ $\lambda_{\text{ex}}=377\text{nm}$  (black),  $\lambda_{\text{ex}}=402\text{nm}$  (red)]

(c) Absorption spectrum of Rhodamine 6G (blue) and emission spectra of hmim[FAP] [ $\lambda_{\text{ex}}=377\text{nm}$  (black),  $\lambda_{\text{ex}}=402\text{nm}$  (red)]

(d) Absorption spectrum of Rhodamine 6G (blue) and emission spectra of hmim[PF<sub>6</sub>] [ $\lambda_{\text{ex}}=377\text{nm}$  (black),  $\lambda_{\text{ex}}=402\text{nm}$  (red)]

(e) Absorption spectrum of Rhodamine 6G (blue) and emission spectra of hmim[BF<sub>4</sub>] [ $\lambda_{\text{ex}}=377\text{nm}$  (black),  $\lambda_{\text{ex}}=402\text{nm}$  (red)].

## S2:

(a): Steady state fluorescence emission spectra of emim[FAP] in presence of different concentrations of Rhodamine 6G [ $\lambda_{\text{ex}}=377\text{nm}$ ]

(b): Stern-Volmer plot of emim[FAP] in presence of different concentrations of Rhodamine 6G [ $\lambda_{\text{ex}}=377\text{nm}$ ]

(c): Steady state fluorescence emission spectra of emim[FAP] in presence of different concentrations of Rhodamine 6G [ $\lambda_{\text{ex}}=402\text{nm}$ ]

(d): Stern-Volmer plot of emim[FAP] in presence of different concentrations of Rhodamine 6G [ $\lambda_{\text{ex}}=402\text{nm}$ ]

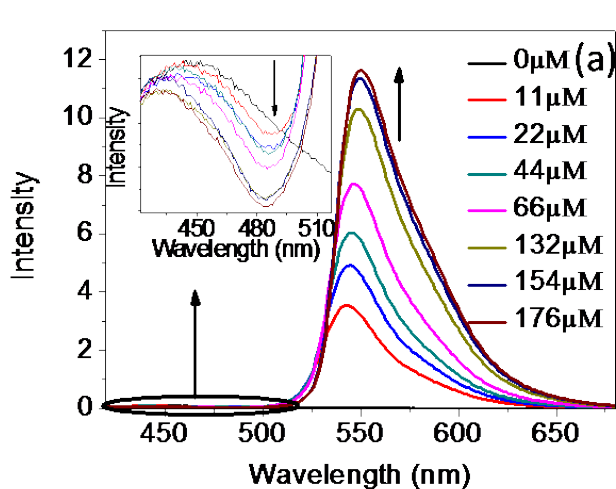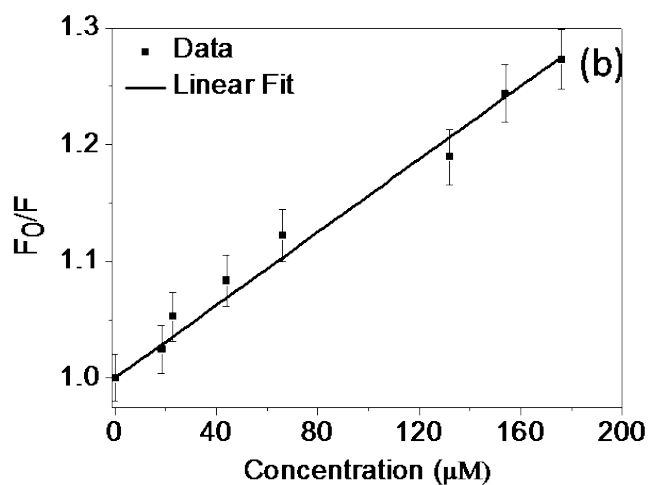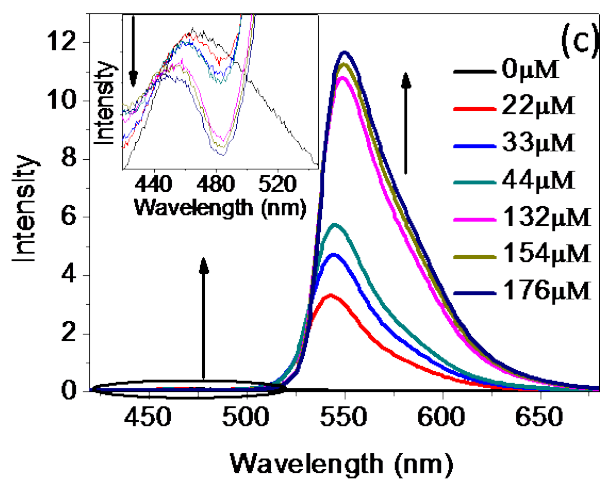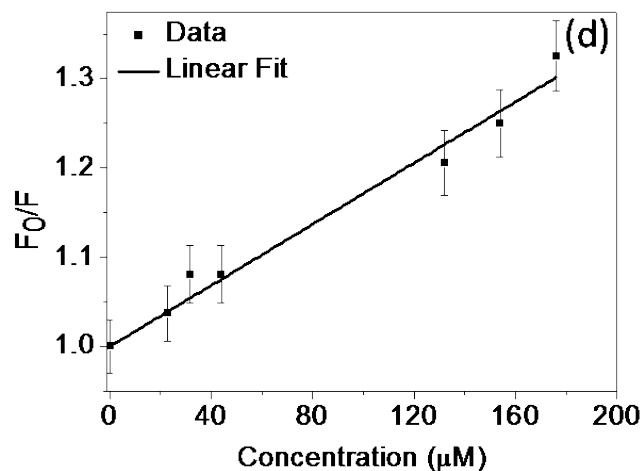

### S3:

- (a): Fluorescence decay curves of emim[FAP] in absence (red) and in presence of Rhodamine 6G (conc.=55 $\mu$ M, green) [ $\lambda_{\text{ex}}$ =377nm,  $\lambda_{\text{em}}$ =450nm]
- (b): Fluorescence decay curve of Rhodamine 6G (conc.=55 $\mu$ M) in emim[FAP] [ $\lambda_{\text{ex}}$ =377nm,  $\lambda_{\text{em}}$ =560nm]
- (c): Fluorescence decay curves of emim[FAP] in absence (red) and in presence of Rhodamine 6G (conc.=55 $\mu$ M, green) [ $\lambda_{\text{ex}}$ =402nm,  $\lambda_{\text{em}}$ =450nm]
- (d): Fluorescence decay curve of Rhodamine 6G (conc.=55 $\mu$ M) in emim[FAP] [ $\lambda_{\text{ex}}$ =402nm,  $\lambda_{\text{em}}$ =560nm]

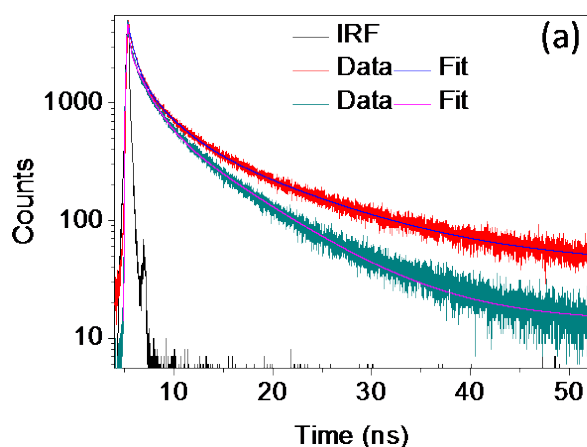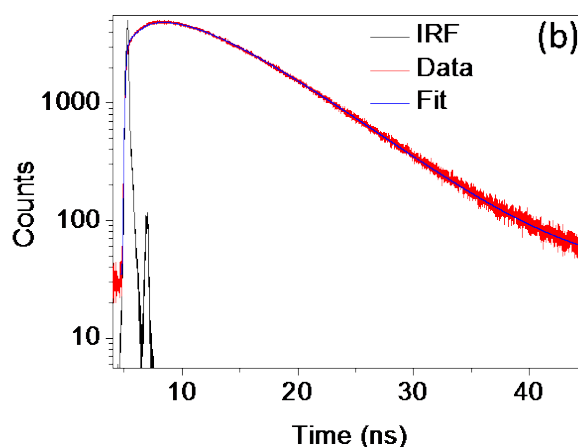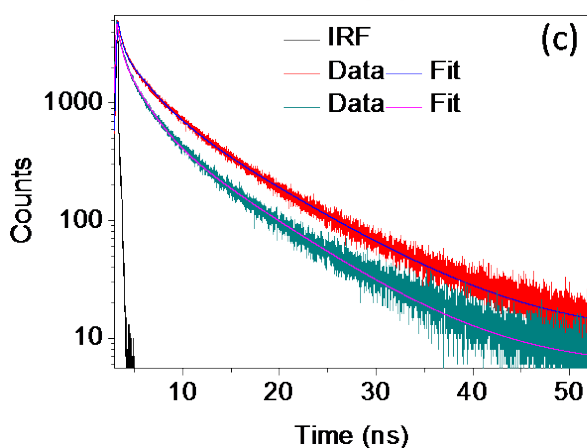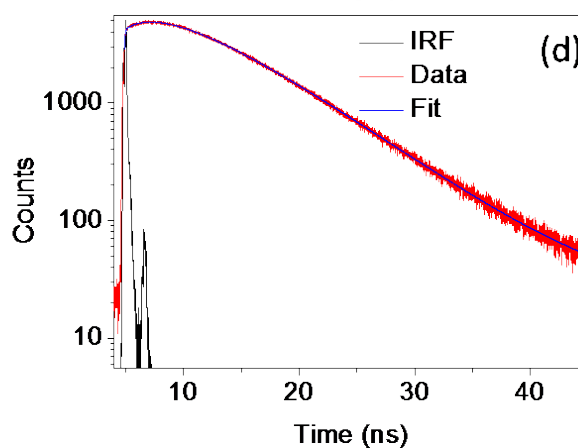

**S4:**

(a) Time constants of fluorescence decay of emim[FAP] in presence of different concentrations of Rhodamine 6G

| $\lambda_{\text{ex}}$<br>(nm) | $\lambda_{\text{em}}$<br>(nm) | Conc.<br>( $\mu\text{M}$ ) | $\tau_1$<br>(ns) | $B_1$ | $\tau_2$<br>(ns) | $B_2$ | $\tau_2$<br>(ns) | $B_3$ | $\langle\tau\rangle$<br>(ns) | $\chi^2$ |
|-------------------------------|-------------------------------|----------------------------|------------------|-------|------------------|-------|------------------|-------|------------------------------|----------|
| 377                           | 450                           | 0                          | 0.870            | 15.71 | 3.54             | 25.5  | 12.65            | 58.79 | 8.48                         | 1.01     |
|                               |                               | 11                         | 0.73             | 15.06 | 3.10             | 30.75 | 11.92            | 54.19 | 7.52                         | 1.01     |
|                               |                               | 22                         | 0.69             | 13.18 | 2.97             | 31.10 | 10.99            | 55.72 | 7.13                         | 1.07     |
|                               |                               | 33                         | 0.49             | 12.81 | 2.31             | 30.04 | 10.21            | 57.15 | 6.59                         | 1.20     |
|                               |                               | 44                         | 0.63             | 15.74 | 2.44             | 30.67 | 10.10            | 53.58 | 6.25                         | 1.14     |
|                               |                               | 55                         | 0.14             | 7.19  | 1.63             | 34.04 | 7.40             | 58.76 | 4.91                         | 1.33     |
| 402                           | 450                           | 0                          | 0.38             | 7.51  | 2.83             | 32.64 | 9.04             | 59.84 | 6.37                         | 1.20     |
|                               |                               | 11                         | 0.36             | 7.31  | 2.44             | 31.33 | 8.32             | 61.36 | 5.89                         | 1.26     |
|                               |                               | 22                         | 0.56             | 9.23  | 2.54             | 38.39 | 8.32             | 52.46 | 5.38                         | 1.07     |
|                               |                               | 22                         | 0.25             | 7.95  | 2.09             | 37.78 | 8.02             | 54.27 | 5.16                         | 1.26     |
|                               |                               | 33                         | 0.22             | 7.69  | 2.00             | 36.70 | 7.80             | 55.61 | 5.08                         | 1.25     |
|                               |                               | 44                         | 0.26             | 8.93  | 1.84             | 36.69 | 7.48             | 54.37 | 4.76                         | 1.30     |
|                               |                               | 44                         | 0.25             | 6.59  | 1.55             | 33.60 | 6.63             | 59.81 | 4.50                         | 1.30     |
|                               |                               | 55                         | 0.41             | 17.96 | 1.21             | 40.52 | 6.59             | 41.51 | 3.29                         | 1.20     |

(b): Time constants of fluorescence decay of Rhodamine 6G (different concentrations) in emim[FAP]

| $\lambda_{\text{ex}}$<br>(nm) | $\lambda_{\text{em}}$<br>(nm) | Conc.<br>( $\mu\text{M}$ ) | $\tau_1$<br>(ns) | $B_1$  | $\tau_2$<br>(ns) | $B_2$ | $\chi^2$ |
|-------------------------------|-------------------------------|----------------------------|------------------|--------|------------------|-------|----------|
| 377                           | 550                           | 22                         | 4.16             | -224.4 | 4.83             | 324.4 | 1.05     |
|                               |                               | 33                         | 4.16             | -175.5 | 5.27             | 275.5 | 1.07     |
|                               |                               | 44                         | 4.16             | -124.7 | 5.61             | 224.7 | 1.06     |
|                               |                               | 55                         | 4.20             | -165.7 | 6.00             | 265.7 | 1.08     |
| 450                           | 550                           | 22                         | 4.11             | -248.9 | 4.88             | 348.9 | 1.06     |
|                               |                               | 33                         | 4.14             | -173.9 | 5.29             | 273.9 | 1.10     |
|                               |                               | 44                         | 4.17             | -167.7 | 5.65             | 267.7 | 1.12     |
|                               |                               | 55                         | 4.14             | -128.7 | 6.05             | 228.7 | 1.02     |

## S5:

(a): Steady state fluorescence emission spectra of bmim[FAP] in presence of different concentrations of Rhodamine 6G [ $\lambda_{\text{ex}}=377\text{nm}$ ]

(b): Stern-Volmer plot of bmim[FAP] in presence of different concentrations of Rhodamine 6G [ $\lambda_{\text{ex}}=377\text{nm}$ ]

(c): Steady state fluorescence emission spectra of bmim[FAP] in presence of different concentrations of Rhodamine 6G [ $\lambda_{\text{ex}}=402\text{nm}$ ]

(d): Stern-Volmer plot of bmim[FAP] in presence of different concentrations of Rhodamine 6G [ $\lambda_{\text{ex}}=402\text{nm}$ ]

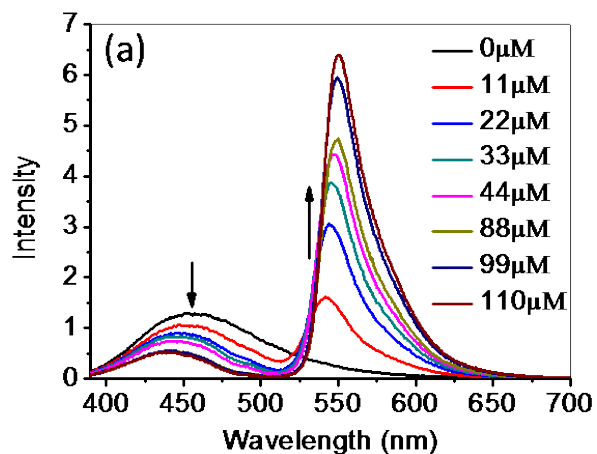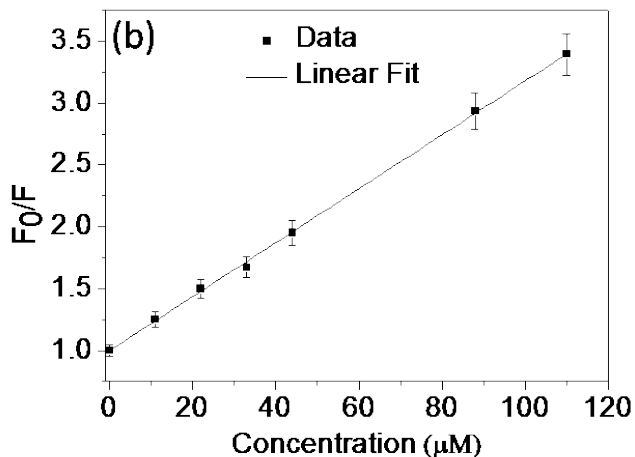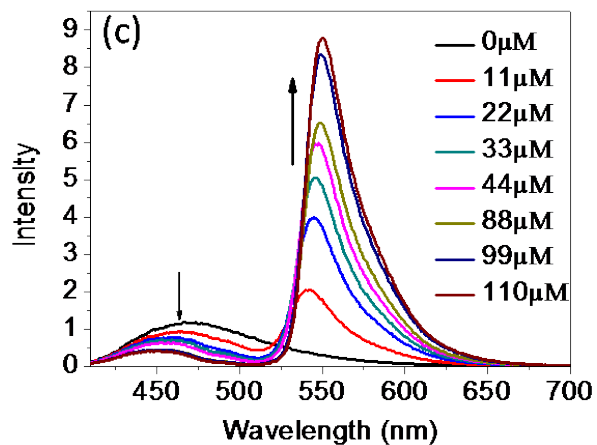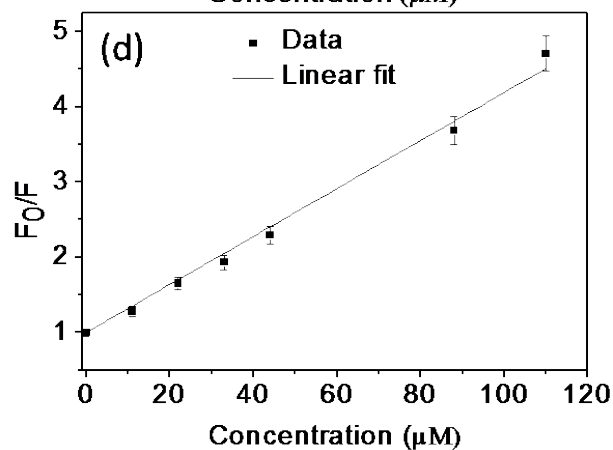

## S6:

(a): Fluorescence decay curves of bmim[FAP] in absence (red) and in presence of Rhodamine 6G

(conc.=110 $\mu$ M, green) [ $\lambda_{ex}$ =377nm,  $\lambda_{em}$ =450nm]

(b): Fluorescence decay curve of Rhodamine 6G (conc.=110 $\mu$ M) in bmim[FAP] [ $\lambda_{ex}$ =377nm,  $\lambda_{em}$ =560nm]

(c): Fluorescence decay curves of bmim[FAP] in absence (red) and in presence of Rhodamine 6G (conc.=110 $\mu$ M, green) [ $\lambda_{ex}$ =402nm,  $\lambda_{em}$ =450nm]

(d): Fluorescence decay curve of Rhodamine 6G (conc.=110 $\mu$ M) in bmim[FAP] [ $\lambda_{ex}$ =402nm,  $\lambda_{em}$ =560nm]

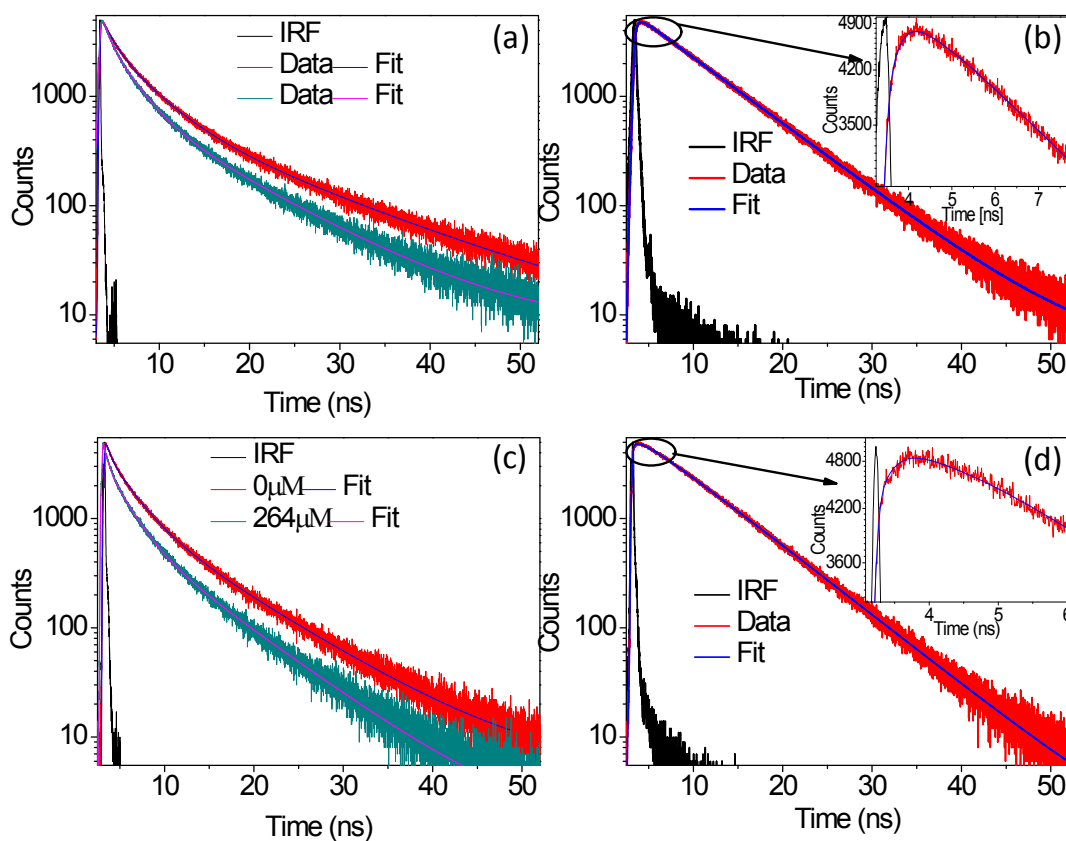



**S7:**

(a): Time constants of fluorescence decay of bmim[FAP] in presence of different concentrations of Rhodamine 6G

| $\lambda_{\text{ex}}$<br>(nm) | $\lambda_{\text{em}}$<br>(nm) | Conc.<br>( $\mu\text{M}$ ) | $\tau_1$<br>(ns) | B <sub>1</sub> | $\tau_2$<br>(ns) | B <sub>2</sub> | $\tau_3$<br>(ns) | B <sub>3</sub> | $\langle\tau\rangle$<br>(ns) | $\chi^2$ |
|-------------------------------|-------------------------------|----------------------------|------------------|----------------|------------------|----------------|------------------|----------------|------------------------------|----------|
| 377                           | 450                           | 0                          | 1.37             | 11.75          | 4.54             | 46.25          | 15.14            | 42.00          | 8.61                         | 1.06     |
|                               |                               | 110                        | 1.18             | 8.80           | 3.44             | 38.85          | 11.97            | 52.35          | 7.70                         | 1.02     |
|                               |                               | 176                        | 0.73             | 8.61           | 2.87             | 43.12          | 10.07            | 48.27          | 6.16                         | 1.06     |
|                               |                               | 220                        | 0.72             | 9.06           | 2.73             | 42.73          | 9.69             | 48.22          | 5.90                         | 1.07     |
|                               |                               | 264                        | 0.54             | 9.16           | 2.64             | 45.07          | 9.46             | 45.77          | 5.56                         | 1.11     |
| 402                           | 450                           | 0                          | 0.43             | 8.13           | 2.16             | 27.73          | 10.36            | 64.13          | 7.30                         | 1.06     |
|                               |                               | 110                        | 0.55             | 3.29           | 2.69             | 38.18          | 8.65             | 58.53          | 6.10                         | 1.06     |
|                               |                               | 176                        | 0.43             | 6.30           | 2.54             | 42.32          | 8.00             | 51.38          | 5.21                         | 1.10     |
|                               |                               | 220                        | 0.36             | 6.58           | 2.36             | 43.38          | 7.77             | 50.03          | 4.93                         | 1.15     |
|                               |                               | 264                        | 0.31             | 6.32           | 2.16             | 43.61          | 7.89             | 48.89          | 4.56                         | 1.16     |

(b): Time constants of fluorescence decay of Rhodamine 6G (different concentrations) in bmim[FAP]

| $\lambda_{\text{ex}}$<br>(nm) | $\lambda_{\text{em}}$<br>(nm) | Conc.<br>( $\mu\text{M}$ ) | $\tau_1$<br>(ns) | B <sub>1</sub> | $\tau_2$<br>(ns) | B <sub>2</sub> | $\chi^2$ |
|-------------------------------|-------------------------------|----------------------------|------------------|----------------|------------------|----------------|----------|
| 377                           | 550                           | 110                        | 3.32             | -5.67          | 6.22             | 105.67         | 1.26     |
|                               |                               | 176                        | 3.34             | -8.60          | 6.45             | 108.60         | 1.26     |
|                               |                               | 220                        | 3.40             | -9.31          | 6.48             | 109.31         | 1.31     |
|                               |                               | 264                        | 3.28             | -5.57          | 6.74             | 105.57         | 1.11     |
| 402                           | 550                           | 110                        | 3.30             | -12.94         | 6.11             | 112.94         | 1.20     |
|                               |                               | 176                        | 3.26             | -13.19         | 6.40             | 113.19         | 1.25     |
|                               |                               | 220                        | 3.24             | -12.23         | 6.49             | 112.23         | 1.15     |
|                               |                               | 264                        | 3.35             | -18.40         | 6.61             | 118.40         | 1.14     |

## S8:

- (a): Steady state fluorescence emission spectra of hmim[FAP] in presence of different concentrations of Rhodamine 6G [ $\lambda_{ex}=377\text{nm}$ ]
- (b): Stern-Volmer plot of hmim[FAP] in presence of different concentrations of Rhodamine 6G [ $\lambda_{ex}=377\text{nm}$ ]
- (c): Steady state fluorescence emission spectra of hmim[FAP] in presence of different concentrations of Rhodamine 6G [ $\lambda_{ex}=402\text{nm}$ ]
- (d): Stern-Volmer plot of hmim[FAP] in presence of different concentrations of Rhodamine 6G [ $\lambda_{ex}=402\text{nm}$ ]

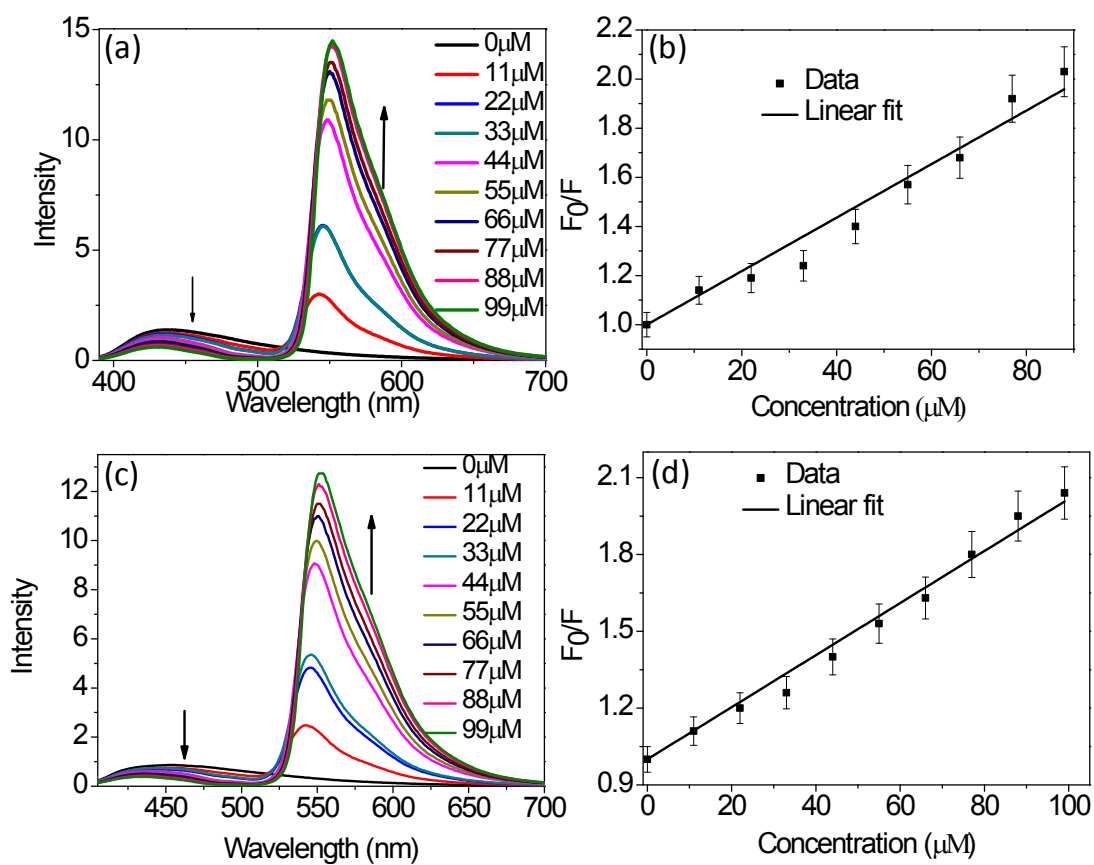

## S9:

(a): Fluorescence decay curves of hmim[FAP] in absence (red) and in presence of Rhodamine 6G

(conc.=99 $\mu$ M, green) [ $\lambda_{ex}$ =377nm,  $\lambda_{em}$ =450nm]

(b): Fluorescence decay curve of Rhodamine 6G (conc.=99 $\mu$ M) in hmim[FAP] [ $\lambda_{ex}$ =377nm,  $\lambda_{em}$ =550nm]

(c): Fluorescence decay curves of hmim[FAP] in absence (red) and in presence of Rhodamine 6G

(conc.=99 $\mu$ M, green) [ $\lambda_{ex}$ =402nm,  $\lambda_{em}$ =470nm]

(d): Fluorescence decay curve of Rhodamine 6G (conc.=99 $\mu$ M) in hmim[FAP] [ $\lambda_{ex}$ =402nm,  $\lambda_{em}$ =550nm]

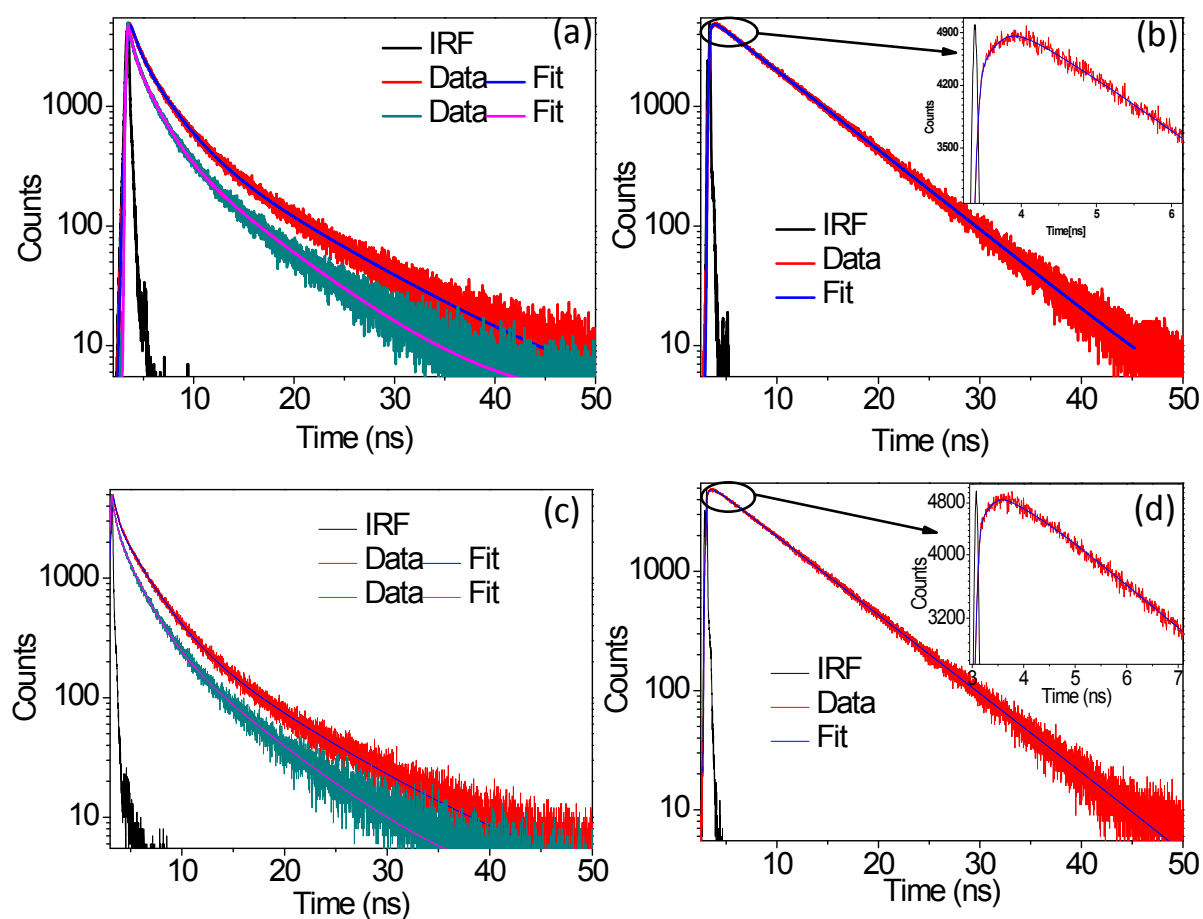

## S10:

**Table 1:** (a): Time constants of fluorescence decay of hmim[FAP] in presence of different concentrations of Rhodamine 6G

| $\lambda_{\text{ex}}$<br>(nm) | $\lambda_{\text{em}}$<br>(nm) | Conc.<br>( $\mu\text{M}$ ) | $\tau_1$<br>(ns) | $B_1$ | $\tau_2$<br>(ns) | $B_2$ | $\tau_3$<br>(ns) | $B_3$ | $\langle\tau\rangle$<br>(ns) | $\chi^2$ |
|-------------------------------|-------------------------------|----------------------------|------------------|-------|------------------|-------|------------------|-------|------------------------------|----------|
| 377                           | 450                           | 0                          | 0.26             | 11.56 | 2.63             | 50.12 | 8.95             | 38.33 | 4.82                         | 1.03     |
|                               |                               | 99                         | 0.31             | 7.95  | 2.1              | 48.96 | 7.70             | 43.09 | 4.37                         | 1.27     |
|                               |                               | 176                        | 0.34             | 8.16  | 1.99             | 45.79 | 7.12             | 46.05 | 4.21                         | 1.19     |
|                               |                               | 220                        | 0.30             | 7.39  | 2.03             | 49.00 | 7.39             | 42.64 | 4.16                         | 1.15     |
|                               |                               | 264                        | 0.34             | 9.99  | 1.89             | 49.14 | 6.76             | 40.87 | 3.72                         | 1.17     |
| 402                           | 450                           | 0                          | 0.30             | 10.09 | 2.47             | 55.49 | 8.27             | 34.42 | 4.02                         | 1.11     |
|                               |                               | 99                         | 0.17             | 8.35  | 1.97             | 47.59 | 6.42             | 44.06 | 3.78                         | 1.16     |
|                               |                               | 176                        | 0.23             | 10.15 | 1.80             | 48.25 | 6.00             | 41.61 | 3.38                         | 1.22     |
|                               |                               | 220                        | 0.25             | 13.22 | 1.90             | 52.10 | 6.44             | 34.68 | 3.25                         | 1.25     |
|                               |                               | 264                        | 0.23             | 13.88 | 1.57             | 47.56 | 5.35             | 38.56 | 2.84                         | 1.15     |

**Table 2:** Time constants of fluorescence decay of Rhodamine 6G (different concentrations) in hmim[FAP]

| $\lambda_{\text{ex}}$<br>(nm) | $\lambda_{\text{em}}$<br>(nm) | Conc.<br>( $\mu\text{M}$ ) | $\tau_1$<br>(ns) | $B_1$  | $\tau_2$<br>(ns) | $B_2$  | $\chi^2$ |
|-------------------------------|-------------------------------|----------------------------|------------------|--------|------------------|--------|----------|
| 377                           | 550                           | 99                         | 3.05             | -4.39  | 5.84             | 104.39 | 1.21     |
|                               |                               | 176                        | 3.21             | -6.60  | 6.08             | 106.60 | 1.14     |
|                               |                               | 220                        | 3.18             | -3.18  | 6.13             | 103.18 | 1.18     |
|                               |                               | 264                        | 3.28             | -4.48  | 6.41             | 104.48 | 1.19     |
| 402                           | 550                           | 99                         | 3.03             | -3.43  | 5.80             | 103.43 | 1.25     |
|                               |                               | 176                        | 3.21             | -6.60  | 6.08             | 106.60 | 1.14     |
|                               |                               | 220                        | 3.26             | -12.07 | 6.22             | 112.07 | 1.16     |
|                               |                               | 264                        | 3.26             | -6.96  | 6.41             | 106.96 | 1.24     |

## S11:

- (a): Steady state fluorescence emission spectra of hmim[PF<sub>6</sub>] in presence of different concentrations of Rhodamine 6G [ $\lambda_{\text{ex}}=377\text{nm}$ ]
- (b): Stern-Volmer plot of hmim[PF<sub>6</sub>] in presence of different concentrations of Rhodamine 6G [ $\lambda_{\text{ex}}=377\text{nm}$ ]
- (c): Steady state fluorescence emission spectra of hmim[PF<sub>6</sub>] in presence of different concentrations of Rhodamine 6G [ $\lambda_{\text{ex}}=402\text{nm}$ ]
- (d): Stern-Volmer plot of hmim[PF<sub>6</sub>] in presence of different concentrations of Rhodamine 6G [ $\lambda_{\text{ex}}=402\text{nm}$ ]

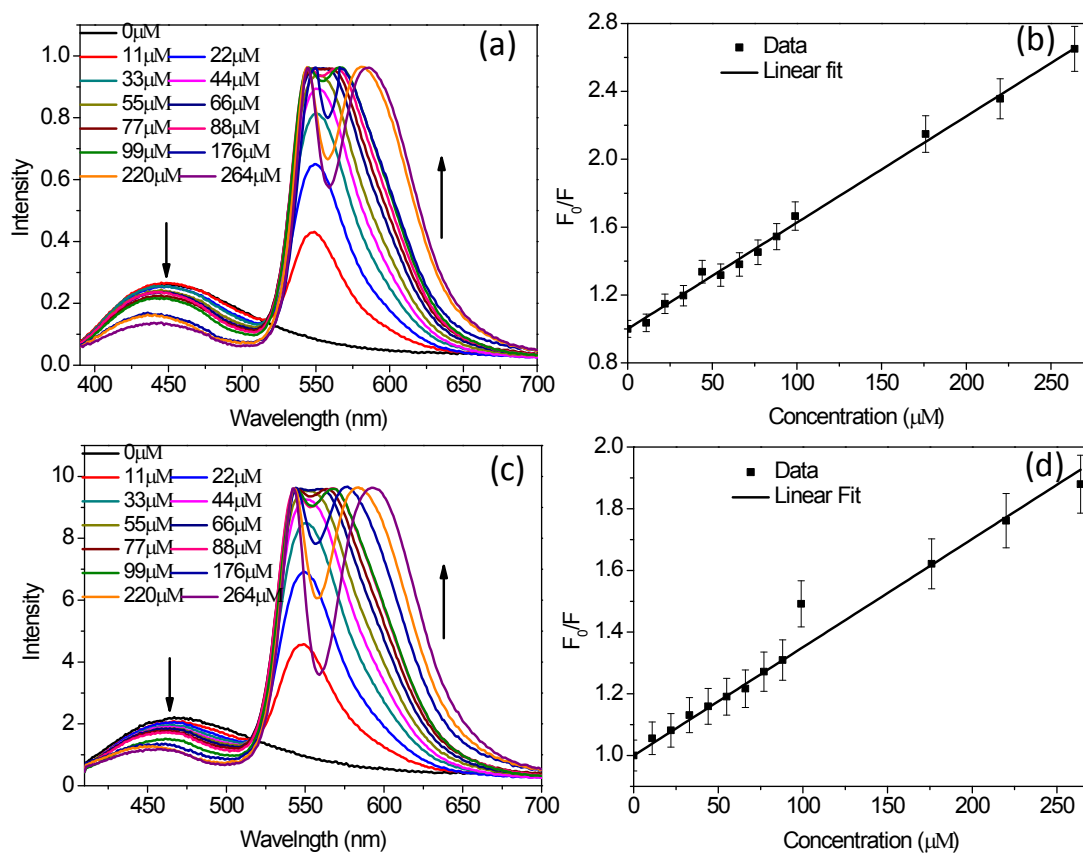

## S12:

(a): Fluorescence decay curves of hmim[PF<sub>6</sub>] in absence (red) and in presence of Rhodamine 6G

(conc.=264μM, green) [ $\lambda_{\text{ex}}$ =377nm,  $\lambda_{\text{em}}$ =450nm]

(b): Fluorescence decay curve of Rhodamine 6G (conc.=264μM) in hmim[PF<sub>6</sub>] [ $\lambda_{\text{ex}}$ =377nm,  $\lambda_{\text{em}}$ =560nm]

(c): Fluorescence decay curves of hmim[PF<sub>6</sub>] in absence (red) and in presence of Rhodamine 6G

(conc.=264μM, green) [ $\lambda_{\text{ex}}$ =402nm,  $\lambda_{\text{em}}$ =470nm]

(d): Fluorescence decay curve of Rhodamine 6G (conc.=264μM) in hmim[PF<sub>6</sub>] [ $\lambda_{\text{ex}}$ =402nm,  $\lambda_{\text{em}}$ =560nm]

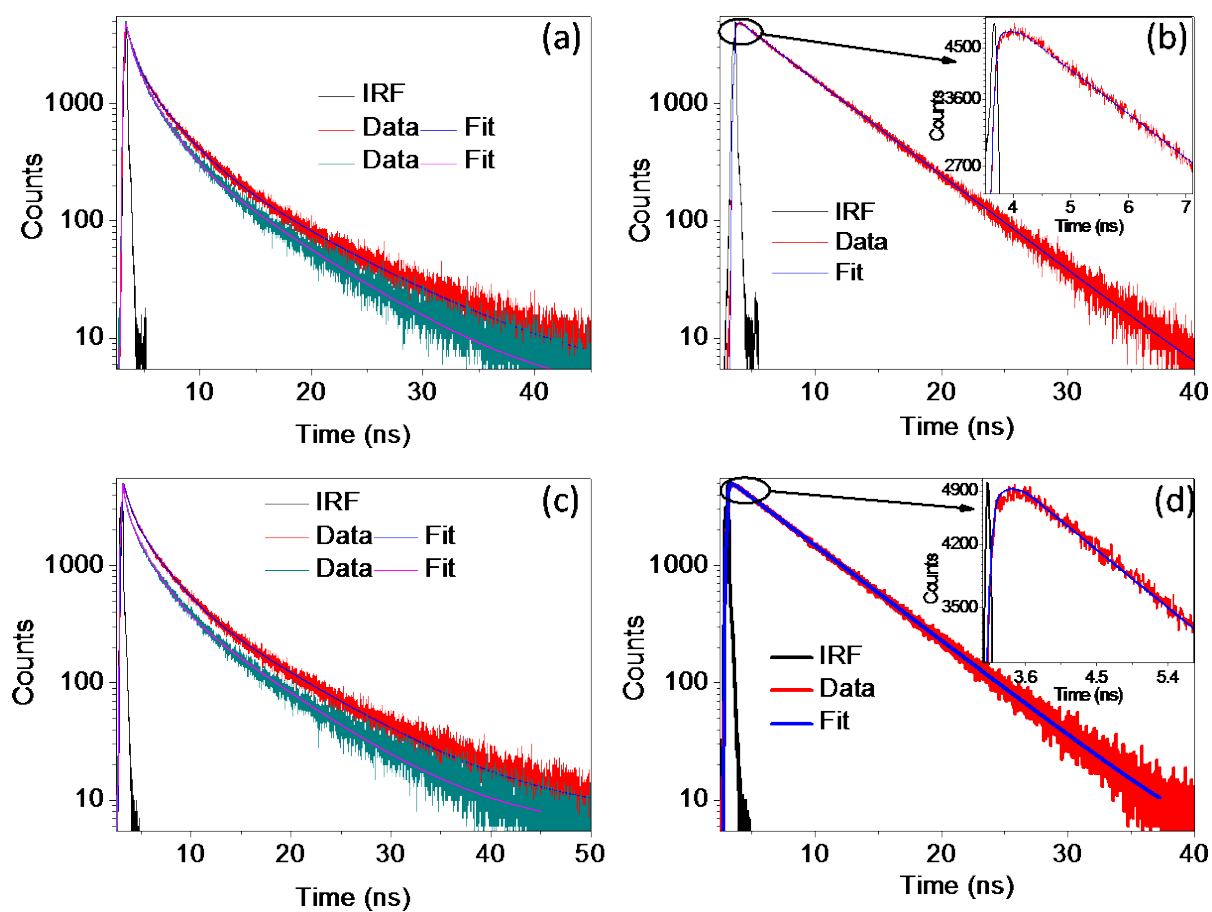

**S13:**

(a): Time constants of fluorescence decay of hmim[PF<sub>6</sub>] in presence of different concentrations of Rhodamine 6G

| $\lambda_{\text{ex}}$<br>(nm) | $\lambda_{\text{em}}$<br>(nm) | Conc.<br>( $\mu\text{M}$ ) | $\tau_1$<br>(ns) | B <sub>1</sub> | $\tau_2$<br>(ns) | B <sub>2</sub> | $\tau_3$<br>(ns) | B <sub>3</sub> | $\langle\tau\rangle$<br>(ns) | $\chi^2$ |
|-------------------------------|-------------------------------|----------------------------|------------------|----------------|------------------|----------------|------------------|----------------|------------------------------|----------|
| 377                           | 450                           | 0                          | 0.40             | 10.42          | 2.27             | 42.68          | 8.46             | 46.90          | 4.97                         | 1.19     |
|                               |                               | 99                         | 0.48             | 13.04          | 2.25             | 47.49          | 7.83             | 39.47          | 4.22                         | 1.22     |
|                               |                               | 176                        | 0.30             | 15.63          | 2.20             | 45.56          | 7.52             | 38.81          | 3.99                         | 1.18     |
|                               |                               | 220                        | 0.38             | 11.82          | 2.00             | 47.57          | 6.87             | 40.62          | 3.78                         | 1.20     |
|                               |                               | 264                        | 0.39             | 12.62          | 1.92             | 47.57          | 6.88             | 39.81          | 3.70                         | 1.17     |
| 402                           | 470                           | 0                          | 0.36             | 8.04           | 2.14             | 44.66          | 8.34             | 47.30          | 5.03                         | 1.14     |
|                               |                               | 99                         | 0.28             | 8.33           | 2.16             | 42.72          | 8.00             | 48.95          | 4.86                         | 1.25     |
|                               |                               | 176                        | 0.22             | 7.75           | 1.96             | 41.34          | 7.47             | 50.91          | 4.63                         | 1.19     |
|                               |                               | 220                        | 0.18             | 9.12           | 1.90             | 42.33          | 7.26             | 48.55          | 4.34                         | 1.23     |
|                               |                               | 264                        | 0.23             | 10.13          | 1.82             | 43.27          | 6.98             | 46.60          | 4.06                         | 1.24     |

(b): Time constants of fluorescence decay of Rhodamine 6G (different concentrations) in hmim[PF<sub>6</sub>]

| $\lambda_{\text{ex}}$<br>(nm) | $\lambda_{\text{em}}$<br>(nm) | Conc.<br>( $\mu\text{M}$ ) | $\tau_1$<br>(ns) | B <sub>1</sub> | $\tau_2$<br>(ns) | B <sub>2</sub> | $\chi^2$ |
|-------------------------------|-------------------------------|----------------------------|------------------|----------------|------------------|----------------|----------|
| 377                           | 550                           | 99                         | 2.71             | -1.23          | 5.13             | 101.23         | 1.24     |
|                               |                               | 176                        | 2.64             | -0.49          | 5.19             | 100.49         | 1.09     |
|                               |                               | 220                        | 2.69             | -1.23          | 5.32             | 101.23         | 1.28     |
|                               |                               | 264                        | 2.65             | -2.01          | 5.26             | 102.26         | 1.20     |
| 402                           | 550                           | 99                         | 2.59             | -2.60          | 5.03             | 102.60         | 1.28     |
|                               |                               | 176                        | 2.71             | -1.23          | 5.13             | 101.23         | 1.24     |
|                               |                               | 220                        | 2.65             | -2.30          | 5.29             | 102.30         | 1.19     |
|                               |                               | 264                        | 2.71             | -2.81          | 5.48             | 102.81         | 1.22     |

## S14:

- (a): Steady state fluorescence spectra of hmim[BF<sub>4</sub>] in presence of different concentrations of Rhodamine 6G [ $\lambda_{\text{ex}}=402\text{nm}$ ]
- (b): Stern-Volmer plot of hmim[BF<sub>4</sub>] in presence of different concentrations of Rhodamine 6G [ $\lambda_{\text{ex}}=402\text{nm}$ ]
- (c): Fluorescence decay curves of hmim[BF<sub>4</sub>] in absence (red) and in presence of Rhodamine 6G (conc.=176 $\mu\text{M}$ , green) [ $\lambda_{\text{ex}}=402\text{nm}$ ,  $\lambda_{\text{em}}=470\text{nm}$ ]
- (d): Fluorescence decay curve of Rhodamine 6G (conc.=176 $\mu\text{M}$ ) in hmim[BF<sub>4</sub>] [ $\lambda_{\text{ex}}=402\text{nm}$ ,  $\lambda_{\text{em}}=560\text{nm}$ ]

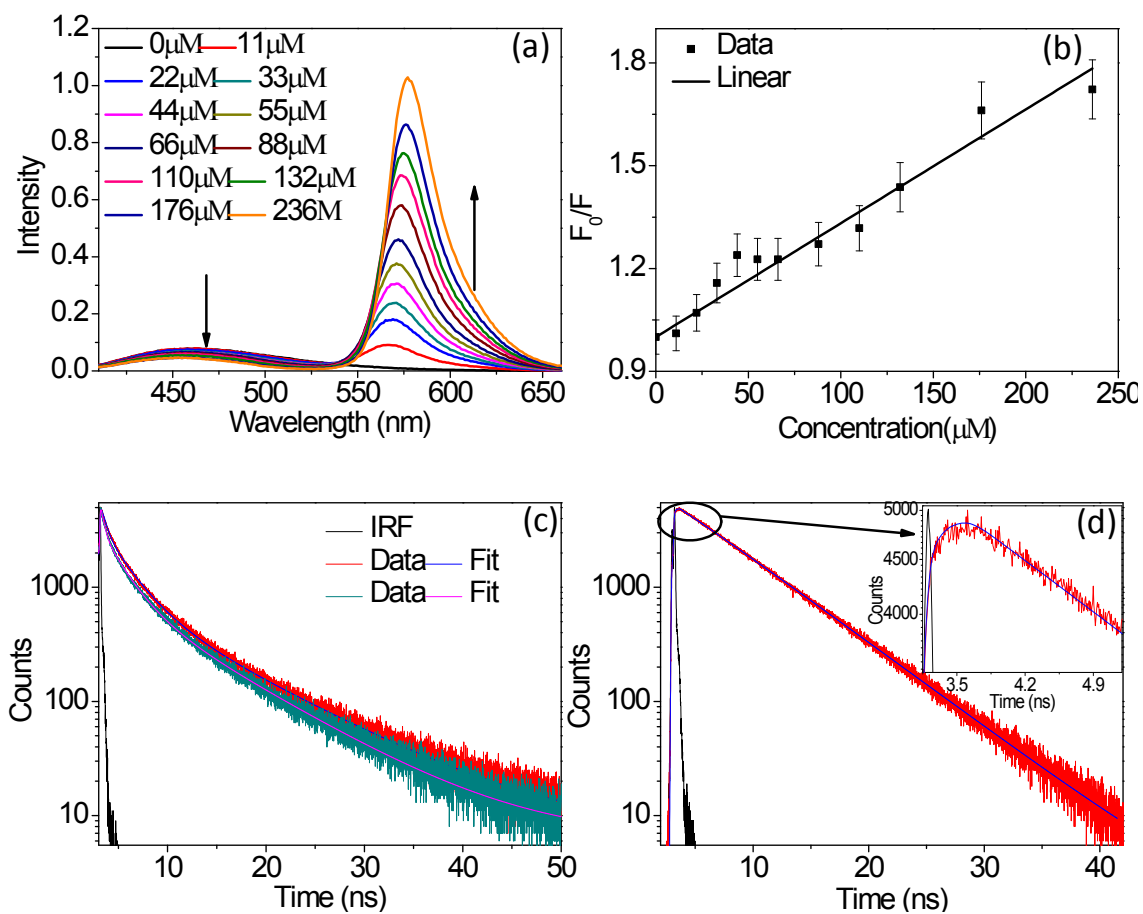

Supplement: c5cp02036k1.pdf [file c5cp02036k1.pdf]
